# Supplementary material for: Integration analysis of senescence-related genes to predict prognosis and immunotherapy response in soft-tissue sarcoma: evidence based on machine learning and experiments
Source: Front Pharmacol. 2023 Jul 11;14:1229233. doi: 10.3389/fphar.2023.1229233 (PMC10367114; doi:10.3389/fphar.2023.1229233)
Supplement: Supplementary file 5 [file Table1.XLSX]

## Sheet: Table S1
Table S1 The primer sequences for qPCR.
Gene	Primer Sequence (5'-3')
GAPDH (F)	GGAGCGAGATCCCTCCAAAAT
GAPDH (R)	GGCTGTTGTCATACTTCTCATGG
E2F1 (F)	ACGCTATGAGACCTCACTGAA
E2F1 (R)	TCCTGGGTCAACCCCTCAAG
MAGOHB (F)	AAGTTTGGGCACGAGTTTCTG
MAGOHB (R)	GTCGGCCAACCCTATCAGG
CEBPB (F)	CTTCAGCCCGTACCTGGAG
CEBPB (R)	GGAGAGGAAGTCGTGGTGC

## Sheet: Table S2
Table S2 The primer sequences for siRNA.
Gene	Primer Sequence (5'-3')
siRNA NC (F)	UUCUCCGAACGUGUCACGU TT
siRNA NC (R)	ACGUGACACGUUCGGAGAA TT
E2F1 siRNA1 (F)	UUAAAUGUUUCCAAACAGGCU TT
E2F1 siRNA1 (R)	CCUGUUUGGAAACAUUUAAUU TT
E2F1 siRNA2 (F)	AAAUUAAAUGUUUCCAAACAG TT
E2F1 siRNA2 (R)	GUUUGGAAACAUUUAAUUUAU TT
